# Supplementary material for: Catalytic valorisation of biomass levulinic acid into gamma valerolactone using formic acid as a H2 donor: a critical review
Source: Royal Society of Chemistry journal article supplement (doi:10.1039/d2ra01379g), 2022-01-01
Supplement: d2ra01379g1.pdf [file d2ra01379g1.pdf]

**Table S1** List of photocatalysts for conversion of levulinic acid in the presence of alcohols as H<sub>2</sub> donor solvents.

| Year | Substrate | H <sub>2</sub> Donor | Catalyst                                                          | T (°C) | t (h)                 | X <sup>a</sup> /Y <sup>b</sup> /TOF <sup>c</sup> | S (%)<br>GVL <sup>d</sup> /HMHD <sup>e</sup> /IL <sup>f</sup> /<br>PA+HOAc <sup>g</sup> | Re f. |
|------|-----------|----------------------|-------------------------------------------------------------------|--------|-----------------------|--------------------------------------------------|-----------------------------------------------------------------------------------------|-------|
| 2016 | LA        | Isopropanol          | Pt/P25-TiO <sub>2</sub>                                           | 20     | 9                     | 54% <sup>a</sup>                                 | 55.2% <sup>d</sup> /33.7% <sup>e</sup><br>/2.3% <sup>f</sup> /6.8% <sup>g</sup>         | [1]   |
|      |           |                      | Pt/NT-TiO <sub>2</sub>                                            |        |                       | 47% <sup>a</sup>                                 | 48.1% <sup>d</sup> /40.8% <sup>e</sup> / 2.1% <sup>f</sup><br>/7.1% <sup>g</sup>        |       |
|      |           |                      | Pt/R-TiO <sub>2</sub>                                             |        |                       | 56% <sup>a</sup>                                 | 59.2% <sup>d</sup> /31.4% <sup>e</sup> /<br>2.3% <sup>f</sup> /6.4% <sup>g</sup>        |       |
|      |           |                      | Pt/RA-TiO <sub>2</sub>                                            |        |                       | 69% <sup>a</sup>                                 | 69.5% <sup>d</sup> /21.9% <sup>e</sup> / 2.0% <sup>f</sup><br>/4.5% <sup>g</sup>        |       |
|      |           |                      | Pd/RA-TiO <sub>2</sub>                                            |        |                       | 71% <sup>a</sup>                                 | 76.4% <sup>d</sup> /17.4% <sup>e</sup> / 1.9% <sup>f</sup><br>/4.5% <sup>g</sup>        |       |
|      |           |                      | Au/RA-TiO <sub>2</sub>                                            |        |                       | 79% <sup>a</sup>                                 | 85.3% <sup>d</sup> /8.2% <sup>e</sup> / 2.0% <sup>f</sup><br>/3.1% <sup>g</sup>         |       |
|      |           |                      | RA-TiO <sub>2</sub>                                               |        |                       | 5.60%                                            | 2.5% <sup>d</sup> /ND <sup>e</sup> / 2.0% <sup>f</sup> /<br>89.2% <sup>g</sup>          |       |
| 2021 | LA        | Ethanol              | Niobic Acid (HY-340)                                              | 25     | 24 + 48 h in darkness | 3.3x10 <sup>-6</sup> s <sup>-1</sup> c           | 44.7% <sup>d</sup>                                                                      | [2]   |
| 2021 | LA        | Isopropanol          | Polymer-supported carboxyl functionalized Zn-porphyrin (PSCFZnPP) | 25     | 24                    | 75% <sup>a</sup>                                 |                                                                                         | [3]   |
| 2022 |           | 2-propanol           | Pt/TiO <sub>2</sub>                                               | 30     | 12                    | 85% <sup>a</sup> /11% <sup>b</sup>               |                                                                                         | [4]   |
|      |           | 2-propanol           | Pt/TiO <sub>2</sub> + NaOH (powder)                               | 30     | 12                    | 67% <sup>b</sup>                                 |                                                                                         |       |
|      |           | 2-propanol           | Pt/TiO <sub>2</sub> + NaOH (aqueous)                              | 30     | 12                    | >99% <sup>b</sup>                                |                                                                                         |       |
|      |           | methanol             | Pt/TiO <sub>2</sub>                                               | 30     | 12                    | 17% <sup>b</sup>                                 |                                                                                         |       |
|      |           | ethanol              | Pt/TiO <sub>2</sub>                                               | 30     | 12                    | 95% <sup>b</sup>                                 |                                                                                         |       |
|      |           | 2-butanol            | Pt/TiO <sub>2</sub>                                               | 30     | 12                    | 57% <sup>b</sup>                                 |                                                                                         |       |
|      |           | 2-propanol           | Pt/ TiO <sub>2</sub> (thermocatalytic)                            | 80     | 15                    | 93% <sup>b</sup>                                 |                                                                                         |       |

X = Conversion (%); Y = Yield (%); TOF = Turnover Frequency (s<sup>-1</sup>); S = Selectivity (%); LA = Levulinic Acid; GVL =  $\gamma$ -valerolactone; HMHD = 6-hydroxy-6-methyl-heptane-2,5-dione; IL = isopropyl levulinate; PA= Pentanoic Acid; HOAc = Acetic Acid

1. Zhang, H., et al., *Hydrogenative cyclization of levulinic acid into  $\gamma$ -valerolactone by photocatalytic intermolecular hydrogen transfer*. *Green Chemistry*, 2016. **18**(8): p. 2296-2301.
2. Jose Filho, B., et al., *A promising approach to transform levulinic acid into  $\gamma$ -valerolactone using niobic acid photocatalyst and the accumulated electron transfer technique*. *Applied Catalysis B: Environmental*, 2021. **285**: p. 119814.
3. Khajone, V.B., et al., *Recyclable polymer-supported carboxyl functionalized Zn-porphyrin photocatalyst for transfer hydrogenation of levulinic acid to  $\gamma$ -valerolactone*. *Biomass Conversion and Biorefinery*, 2021: p. 1-11.
4. Bunrit, A., et al., *Photo-Thermo-Dual Catalysis of Levulinic Acid and Levulinate Ester to  $\gamma$ -Valerolactone*. *ACS Catalysis*, 2022. **12**: p. 1677-1685.
